# Supplementary material
Source: publisher figshare collection journal article supplement (https://asha.figshare.com/articles/dataset/_/10086434)
Supplement: Supplementary file 1 [file 1]

## MY AUDIOLOGY VISIT: MY SCHEDULE

|                                                                                                                  |                          |
|------------------------------------------------------------------------------------------------------------------|--------------------------|
|  <p><b>Ear Light</b></p>        | <input type="checkbox"/> |
|  <p><b>Ear Picture</b></p>      | <input type="checkbox"/> |
|  <p><b>Ear Music</b></p>       | <input type="checkbox"/> |
|  <p><b>Word Game</b></p>      | <input type="checkbox"/> |
|  <p><b>Listening Game</b></p> | <input type="checkbox"/> |

 **JFK Partners**  
UNIVERSITY OF COLORADO  
ANSCHUTZ MEDICAL CAMPUS

 <https://doi.org/10.17605/OSF.IO/B23UX>

 **University of Colorado  
Boulder**

**Supplemental Material S3.** Example of a visual schedule (Video Model 1).
